# Supplementary material
Source: publisher figshare collection journal article supplement (https://acs.figshare.com/ndownloader/files/7715626)
Supplement: Supplementary file 1 [file 7715626]

 
data_z 
 
_audit_creation_method            SHELXL-97 
_chemical_name_systematic 
; 
 ? 
; 
_chemical_name_common             ? 
_chemical_melting_point           ? 
_chemical_formula_moiety          ? 
_chemical_formula_sum 
 'C27 H21 Cl2 F3 N2 O4' 
_chemical_formula_weight          565.36 
 
loop_ 
 _atom_type_symbol 
 _atom_type_description 
 _atom_type_scat_dispersion_real 
 _atom_type_scat_dispersion_imag 
 _atom_type_scat_source 
 'C'  'C'   0.0033   0.0016 
 'International Tables Vol C Tables 4.2.6.8 and 6.1.1.4' 
 'H'  'H'   0.0000   0.0000 
 'International Tables Vol C Tables 4.2.6.8 and 6.1.1.4' 
 'N'  'N'   0.0061   0.0033 
 'International Tables Vol C Tables 4.2.6.8 and 6.1.1.4' 
 'O'  'O'   0.0106   0.0060 
 'International Tables Vol C Tables 4.2.6.8 and 6.1.1.4' 
 'Cl'  'Cl'   0.1484   0.1585 
 'International Tables Vol C Tables 4.2.6.8 and 6.1.1.4' 
 'F'  'F'   0.0171   0.0103 
 'International Tables Vol C Tables 4.2.6.8 and 6.1.1.4' 
 
_symmetry_cell_setting            Monoclinic
_symmetry_space_group_name_H-M    P2(1)/n 
 
loop_ 
 _symmetry_equiv_pos_as_xyz 
 'x, y, z' 
 '-x+1/2, y+1/2, -z+1/2' 
 '-x, -y, -z' 
 'x-1/2, -y-1/2, z-1/2' 
 
_cell_length_a                    10.5390(12) 
_cell_length_b                    19.502(2) 
_cell_length_c                    14.1053(17) 
_cell_angle_alpha                 90.00 
_cell_angle_beta                  111.240(4) 
_cell_angle_gamma                 90.00 
_cell_volume                      2702.1(5) 
_cell_formula_units_Z             4 
_cell_measurement_temperature     296(2) 
_cell_measurement_reflns_used     ? 
_cell_measurement_theta_min       ? 
_cell_measurement_theta_max       ? 
 
_exptl_crystal_description        block
_exptl_crystal_colour             colorless 
_exptl_crystal_size_max           0.28 
_exptl_crystal_size_mid           0.23 
_exptl_crystal_size_min           0.12 
_exptl_crystal_density_meas       ? 
_exptl_crystal_density_diffrn     1.390 
_exptl_crystal_density_method     'not measured' 
_exptl_crystal_F_000              1160 
_exptl_absorpt_coefficient_mu     0.297 
_exptl_absorpt_correction_type    multi-scan 
_exptl_absorpt_correction_T_min   0.9216 
_exptl_absorpt_correction_T_max   0.9653 
_exptl_absorpt_process_details    sadabs
 
_exptl_special_details 
; 
 ? 
; 
 
_diffrn_ambient_temperature       296(2) 
_diffrn_radiation_wavelength      0.71073 
_diffrn_radiation_type            MoK\a 
_diffrn_radiation_source          'fine-focus sealed tube' 
_diffrn_radiation_monochromator   graphite 
_diffrn_measurement_device_type   ? 
_diffrn_measurement_method        ? 
_diffrn_detector_area_resol_mean  ? 
_diffrn_reflns_number             31256 
_diffrn_reflns_av_R_equivalents   0.0438 
_diffrn_reflns_av_sigmaI/netI     0.0275 
_diffrn_reflns_limit_h_min        -11 
_diffrn_reflns_limit_h_max        12 
_diffrn_reflns_limit_k_min        -23 
_diffrn_reflns_limit_k_max        22 
_diffrn_reflns_limit_l_min        -16 
_diffrn_reflns_limit_l_max        16 
_diffrn_reflns_theta_min          1.87 
_diffrn_reflns_theta_max          25.01 
_reflns_number_total              4762 
_reflns_number_gt                 3161 
_reflns_threshold_expression      >2sigma(I) 
 
_computing_data_collection        ? 
_computing_cell_refinement        ? 
_computing_data_reduction         ? 
_computing_structure_solution     'SHELXS-97 (Sheldrick, 2008)' 
_computing_structure_refinement   'SHELXL-97 (Sheldrick, 2008)' 
_computing_molecular_graphics     ? 
_computing_publication_material   ? 
 
_refine_special_details 
; 
 Refinement of F^2^ against ALL reflections.  The weighted R-factor wR and 
 goodness of fit S are based on F^2^, conventional R-factors R are based 
 on F, with F set to zero for negative F^2^. The threshold expression of 
 F^2^ > 2sigma(F^2^) is used only for calculating R-factors(gt) etc. and is 
 not relevant to the choice of reflections for refinement.  R-factors based 
 on F^2^ are statistically about twice as large as those based on F, and R- 
 factors based on ALL data will be even larger. 
; 
 
_refine_ls_structure_factor_coef  Fsqd  
_refine_ls_matrix_type            full 
_refine_ls_weighting_scheme       calc  
_refine_ls_weighting_details 
 'calc w=1/[\s^2^(Fo^2^)+(0.1103P)^2^+2.3219P] where P=(Fo^2^+2Fc^2^)/3' 
_atom_sites_solution_primary      direct 
_atom_sites_solution_secondary    difmap 
_atom_sites_solution_hydrogens    geom 
_refine_ls_hydrogen_treatment     constr
_refine_ls_extinction_method      none 
_refine_ls_extinction_coef        ? 
_refine_ls_number_reflns          4762 
_refine_ls_number_parameters      361 
_refine_ls_number_restraints      0 
_refine_ls_R_factor_all           0.1039 
_refine_ls_R_factor_gt            0.0720 
_refine_ls_wR_factor_ref          0.2300 
_refine_ls_wR_factor_gt           0.1991 
_refine_ls_goodness_of_fit_ref    1.040 
_refine_ls_restrained_S_all       1.040 
_refine_ls_shift/su_max           0.000 
_refine_ls_shift/su_mean          0.000 
 
loop_ 
 _atom_site_label 
 _atom_site_type_symbol 
 _atom_site_fract_x 
 _atom_site_fract_y 
 _atom_site_fract_z 
 _atom_site_U_iso_or_equiv 
 _atom_site_adp_type 
 _atom_site_occupancy 
 _atom_site_symmetry_multiplicity 
 _atom_site_calc_flag 
 _atom_site_refinement_flags 
 _atom_site_disorder_assembly 
 _atom_site_disorder_group 
F1 F -0.3316(8) -0.0042(2) 0.1370(6) 0.271(4) Uani 1 1 d . . . 
F2 F -0.2904(6) 0.0577(3) 0.2603(4) 0.195(2) Uani 1 1 d . . . 
F3 F -0.4435(5) 0.0796(3) 0.1388(5) 0.202(2) Uani 1 1 d . . . 
O1 O 0.0537(3) 0.05538(14) -0.0856(2) 0.0755(8) Uani 1 1 d . . . 
O2 O 0.2039(2) 0.09676(12) 0.05913(18) 0.0568(6) Uani 1 1 d . . . 
O3 O -0.2247(3) 0.22517(15) -0.27438(19) 0.0762(8) Uani 1 1 d . . . 
O4 O -0.2310(2) 0.31848(13) -0.13000(19) 0.0647(7) Uani 1 1 d . . . 
N1 N -0.0453(3) 0.17547(15) -0.1560(2) 0.0543(7) Uani 1 1 d . . . 
H1A H -0.0625 0.1377 -0.1898 0.065 Uiso 1 1 calc R . . 
N2 N -0.0126(3) 0.28503(13) -0.02359(19) 0.0466(6) Uani 1 1 d . . . 
C1 C 0.1976(3) 0.20891(18) -0.0803(3) 0.0513(8) Uani 1 1 d . . . 
C2 C 0.1990(4) 0.2133(2) -0.1777(3) 0.0715(11) Uani 1 1 d . . . 
H2A H 0.1238 0.1986 -0.2325 0.086 Uiso 1 1 calc R . . 
C3 C 0.3117(5) 0.2394(3) -0.1945(4) 0.0854(13) Uani 1 1 d . . . 
H3A H 0.3110 0.2424 -0.2605 0.102 Uiso 1 1 calc R . . 
C4 C 0.4229(5) 0.2606(2) -0.1152(4) 0.0825(13) Uani 1 1 d . . . 
H4A H 0.4983 0.2779 -0.1266 0.099 Uiso 1 1 calc R . . 
C5 C 0.4230(4) 0.2563(2) -0.0183(4) 0.0805(13) Uani 1 1 d . . . 
H5A H 0.4989 0.2707 0.0362 0.097 Uiso 1 1 calc R . . 
C6 C 0.3114(4) 0.2309(2) -0.0011(3) 0.0645(10) Uani 1 1 d . . . 
H6A H 0.3128 0.2285 0.0652 0.077 Uiso 1 1 calc R . . 
C7 C 0.0738(3) 0.17745(17) -0.0624(2) 0.0469(8) Uani 1 1 d . . . 
C8 C 0.0335(3) 0.21606(16) 0.0181(2) 0.0429(7) Uani 1 1 d . . . 
H8A H 0.1172 0.2224 0.0776 0.052 Uiso 1 1 calc R . . 
C9 C -0.0751(3) 0.32597(17) 0.0305(3) 0.0516(8) Uani 1 1 d . . . 
C10 C -0.0286(4) 0.3454(2) 0.1309(3) 0.0667(10) Uani 1 1 d . . . 
H10A H 0.0561 0.3315 0.1761 0.080 Uiso 1 1 calc R . . 
C11 C -0.1135(5) 0.3868(2) 0.1621(4) 0.0851(13) Uani 1 1 d . . . 
H11A H -0.0837 0.4021 0.2291 0.102 Uiso 1 1 calc R . . 
C12 C -0.2400(5) 0.4055(3) 0.0964(4) 0.0889(14) Uani 1 1 d . . . 
H12A H -0.2950 0.4325 0.1201 0.107 Uiso 1 1 calc R . . 
C13 C -0.2877(4) 0.3854(2) -0.0035(4) 0.0790(12) Uani 1 1 d . . . 
H13A H -0.3736 0.3982 -0.0482 0.095 Uiso 1 1 calc R . . 
C14 C -0.2023(4) 0.34550(19) -0.0344(3) 0.0587(9) Uani 1 1 d . . . 
C15 C -0.1294(3) 0.22788(19) -0.1931(2) 0.0544(9) Uani 1 1 d . . . 
C16 C -0.1007(3) 0.29354(19) -0.1311(2) 0.0533(8) Uani 1 1 d . . . 
C17 C -0.0439(4) 0.3478(2) -0.1811(3) 0.0725(11) Uani 1 1 d . . . 
H17A H -0.0268 0.3890 -0.1410 0.109 Uiso 1 1 calc R . . 
H17B H -0.1085 0.3573 -0.2479 0.109 Uiso 1 1 calc R . . 
H17C H 0.0395 0.3317 -0.1860 0.109 Uiso 1 1 calc R . . 
C18 C -0.0645(3) 0.17569(16) 0.0538(2) 0.0446(7) Uani 1 1 d . . . 
C19 C -0.0129(4) 0.14215(19) 0.1467(3) 0.0567(9) Uani 1 1 d . . . 
H19A H 0.0793 0.1459 0.1858 0.068 Uiso 1 1 calc R . . 
C20 C -0.0957(4) 0.1035(2) 0.1821(3) 0.0688(10) Uani 1 1 d . . . 
H20A H -0.0590 0.0807 0.2440 0.083 Uiso 1 1 calc R . . 
C21 C -0.2332(4) 0.0985(2) 0.1259(3) 0.0639(10) Uani 1 1 d . . . 
C22 C -0.2864(4) 0.1327(2) 0.0347(3) 0.0643(10) Uani 1 1 d . . . 
H22A H -0.3792 0.1300 -0.0030 0.077 Uiso 1 1 calc R . . 
C23 C -0.2037(3) 0.17089(18) -0.0012(3) 0.0551(8) Uani 1 1 d . . . 
H23A H -0.2412 0.1938 -0.0629 0.066 Uiso 1 1 calc R . . 
C24 C 0.1077(3) 0.10245(18) -0.0317(3) 0.0510(8) Uani 1 1 d . . . 
C25 C 0.2414(4) 0.0280(2) 0.0953(3) 0.0780(12) Uani 1 1 d . . . 
H25A H 0.3118 0.0295 0.1616 0.117 Uiso 1 1 calc R . . 
H25B H 0.2740 0.0040 0.0493 0.117 Uiso 1 1 calc R . . 
H25C H 0.1633 0.0046 0.0994 0.117 Uiso 1 1 calc R . . 
C26 C -0.3216(6) 0.0559(3) 0.1620(5) 0.1006(17) Uani 1 1 d . . . 
Cl1 Cl -0.5828(5) 0.4339(3) 0.1277(5) 0.201(4) Uani 0.50 1 d P A 1 
Cl2 Cl -0.7247(9) 0.4676(3) 0.1749(3) 0.182(3) Uani 0.50 1 d P A 1 
Cl1' Cl -0.6126(8) 0.4285(3) 0.0303(9) 0.278(5) Uani 0.50 1 d P A 2 
Cl2' Cl -0.8448(11) 0.4764(3) 0.0956(12) 0.324(7) Uani 0.50 1 d P A 2 
C01 C -0.7524(6) 0.4252(4) 0.0593(5) 0.121(2) Uani 1 1 d . . . 
 
loop_ 
 _atom_site_aniso_label 
 _atom_site_aniso_U_11 
 _atom_site_aniso_U_22 
 _atom_site_aniso_U_33 
 _atom_site_aniso_U_23 
 _atom_site_aniso_U_13 
 _atom_site_aniso_U_12 
F1 0.429(9) 0.099(3) 0.485(10) -0.078(4) 0.405(9) -0.112(4) 
F2 0.218(5) 0.246(6) 0.160(4) 0.048(4) 0.117(4) -0.066(4) 
F3 0.130(3) 0.238(6) 0.291(6) 0.087(5) 0.141(4) -0.004(3) 
O1 0.0776(18) 0.0573(16) 0.0801(18) -0.0179(14) 0.0147(15) -0.0087(14) 
O2 0.0517(13) 0.0473(14) 0.0646(15) 0.0016(11) 0.0129(11) 0.0012(10) 
O3 0.0662(17) 0.091(2) 0.0510(15) 0.0019(13) -0.0027(13) -0.0034(14) 
O4 0.0454(13) 0.0729(17) 0.0662(16) 0.0052(13) 0.0086(11) 0.0105(12) 
N1 0.0507(16) 0.0608(18) 0.0441(14) -0.0109(13) 0.0086(12) -0.0053(14) 
N2 0.0424(14) 0.0480(15) 0.0467(15) 0.0022(12) 0.0127(12) 0.0031(12) 
C1 0.0487(18) 0.0515(19) 0.0572(19) -0.0029(15) 0.0236(16) -0.0009(15) 
C2 0.069(2) 0.089(3) 0.064(2) -0.010(2) 0.033(2) -0.009(2) 
C3 0.091(3) 0.099(3) 0.089(3) -0.002(3) 0.059(3) -0.010(3) 
C4 0.075(3) 0.078(3) 0.115(4) 0.002(3) 0.060(3) -0.007(2) 
C5 0.056(2) 0.092(3) 0.097(3) -0.005(3) 0.031(2) -0.019(2) 
C6 0.051(2) 0.078(3) 0.064(2) -0.0035(19) 0.0196(17) -0.0096(18) 
C7 0.0399(16) 0.053(2) 0.0440(16) -0.0055(14) 0.0112(13) -0.0029(14) 
C8 0.0365(15) 0.0472(18) 0.0414(16) -0.0038(13) 0.0096(13) -0.0018(13) 
C9 0.0496(18) 0.0468(19) 0.059(2) 0.0019(15) 0.0205(15) 0.0003(15) 
C10 0.069(2) 0.066(2) 0.063(2) -0.0056(18) 0.0221(19) 0.0073(19) 
C11 0.101(4) 0.078(3) 0.084(3) -0.017(2) 0.043(3) 0.010(3) 
C12 0.088(3) 0.078(3) 0.114(4) -0.009(3) 0.052(3) 0.018(3) 
C13 0.060(2) 0.070(3) 0.106(4) 0.002(2) 0.029(2) 0.016(2) 
C14 0.051(2) 0.055(2) 0.069(2) 0.0043(17) 0.0194(17) 0.0037(16) 
C15 0.0479(19) 0.067(2) 0.0427(18) 0.0033(16) 0.0095(15) -0.0054(17) 
C16 0.0460(18) 0.061(2) 0.0479(18) 0.0088(15) 0.0113(14) 0.0046(16) 
C17 0.082(3) 0.069(3) 0.065(2) 0.017(2) 0.024(2) -0.006(2) 
C18 0.0433(16) 0.0444(18) 0.0458(16) -0.0040(13) 0.0158(13) 0.0017(13) 
C19 0.0521(19) 0.067(2) 0.0500(19) 0.0032(16) 0.0177(16) 0.0020(17) 
C20 0.078(3) 0.078(3) 0.059(2) 0.0120(19) 0.034(2) 0.002(2) 
C21 0.073(3) 0.058(2) 0.077(2) 0.0017(19) 0.046(2) -0.0034(19) 
C22 0.051(2) 0.065(2) 0.080(3) -0.003(2) 0.0282(19) -0.0058(17) 
C23 0.0454(18) 0.060(2) 0.059(2) 0.0071(17) 0.0171(15) -0.0003(16) 
C24 0.0441(17) 0.053(2) 0.058(2) -0.0100(16) 0.0211(16) -0.0045(15) 
C25 0.076(3) 0.051(2) 0.095(3) 0.010(2) 0.015(2) 0.0046(19) 
C26 0.111(4) 0.098(4) 0.125(4) 0.015(3) 0.081(4) -0.011(3) 
Cl1 0.121(3) 0.187(5) 0.228(6) 0.108(5) -0.019(4) -0.050(3) 
Cl2 0.325(9) 0.114(3) 0.090(2) -0.008(2) 0.056(3) -0.039(4) 
Cl1' 0.285(8) 0.119(4) 0.576(15) 0.074(7) 0.332(10) 0.078(5) 
Cl2' 0.358(11) 0.098(3) 0.69(2) -0.032(8) 0.401(14) -0.040(5) 
C01 0.101(4) 0.131(5) 0.125(5) -0.020(4) 0.034(4) -0.016(4) 
 
_geom_special_details 
; 
 All esds (except the esd in the dihedral angle between two l.s. planes) 
 are estimated using the full covariance matrix.  The cell esds are taken 
 into account individually in the estimation of esds in distances, angles 
 and torsion angles; correlations between esds in cell parameters are only 
 used when they are defined by crystal symmetry.  An approximate (isotropic) 
 treatment of cell esds is used for estimating esds involving l.s. planes. 
; 
 
loop_ 
 _geom_bond_atom_site_label_1 
 _geom_bond_atom_site_label_2 
 _geom_bond_distance 
 _geom_bond_site_symmetry_2 
 _geom_bond_publ_flag 
F1 C26 1.217(7) . ? 
F2 C26 1.305(7) . ? 
F3 C26 1.291(7) . ? 
O1 C24 1.196(4) . ? 
O2 C24 1.319(4) . ? 
O2 C25 1.438(4) . ? 
O3 C15 1.222(4) . ? 
O4 C14 1.375(4) . ? 
O4 C16 1.462(4) . ? 
N1 C15 1.329(4) . ? 
N1 C7 1.456(4) . ? 
N1 H1A 0.8600 . ? 
N2 C9 1.420(4) . ? 
N2 C16 1.473(4) . ? 
N2 C8 1.478(4) . ? 
C1 C6 1.379(5) . ? 
C1 C2 1.381(5) . ? 
C1 C7 1.543(4) . ? 
C2 C3 1.389(6) . ? 
C2 H2A 0.9300 . ? 
C3 C4 1.359(7) . ? 
C3 H3A 0.9300 . ? 
C4 C5 1.368(6) . ? 
C4 H4A 0.9300 . ? 
C5 C6 1.377(5) . ? 
C5 H5A 0.9300 . ? 
C6 H6A 0.9300 . ? 
C7 C24 1.530(5) . ? 
C7 C8 1.545(4) . ? 
C8 C18 1.523(4) . ? 
C8 H8A 0.9800 . ? 
C9 C10 1.374(5) . ? 
C9 C14 1.375(5) . ? 
C10 C11 1.389(6) . ? 
C10 H10A 0.9300 . ? 
C11 C12 1.370(6) . ? 
C11 H11A 0.9300 . ? 
C12 C13 1.371(6) . ? 
C12 H12A 0.9300 . ? 
C13 C14 1.376(5) . ? 
C13 H13A 0.9300 . ? 
C15 C16 1.517(5) . ? 
C16 C17 1.510(5) . ? 
C17 H17A 0.9600 . ? 
C17 H17B 0.9600 . ? 
C17 H17C 0.9600 . ? 
C18 C19 1.388(5) . ? 
C18 C23 1.392(4) . ? 
C19 C20 1.377(5) . ? 
C19 H19A 0.9300 . ? 
C20 C21 1.379(5) . ? 
C20 H20A 0.9300 . ? 
C21 C22 1.376(5) . ? 
C21 C26 1.470(6) . ? 
C22 C23 1.375(5) . ? 
C22 H22A 0.9300 . ? 
C23 H23A 0.9300 . ? 
C25 H25A 0.9600 . ? 
C25 H25B 0.9600 . ? 
C25 H25C 0.9600 . ? 
Cl1 C01 1.704(7) . ? 
Cl1 Cl2 1.958(10) . ? 
Cl2 C01 1.757(8) . ? 
Cl1' C01 1.666(8) . ? 
Cl2' C01 1.603(9) . ? 
 
loop_ 
 _geom_angle_atom_site_label_1 
 _geom_angle_atom_site_label_2 
 _geom_angle_atom_site_label_3 
 _geom_angle 
 _geom_angle_site_symmetry_1 
 _geom_angle_site_symmetry_3 
 _geom_angle_publ_flag 
C24 O2 C25 116.0(3) . . ? 
C14 O4 C16 105.3(2) . . ? 
C15 N1 C7 124.7(3) . . ? 
C15 N1 H1A 117.7 . . ? 
C7 N1 H1A 117.7 . . ? 
C9 N2 C16 104.3(2) . . ? 
C9 N2 C8 116.6(2) . . ? 
C16 N2 C8 120.4(3) . . ? 
C6 C1 C2 117.9(3) . . ? 
C6 C1 C7 122.0(3) . . ? 
C2 C1 C7 120.1(3) . . ? 
C1 C2 C3 120.7(4) . . ? 
C1 C2 H2A 119.7 . . ? 
C3 C2 H2A 119.7 . . ? 
C4 C3 C2 120.5(4) . . ? 
C4 C3 H3A 119.8 . . ? 
C2 C3 H3A 119.8 . . ? 
C3 C4 C5 119.5(4) . . ? 
C3 C4 H4A 120.3 . . ? 
C5 C4 H4A 120.3 . . ? 
C4 C5 C6 120.4(4) . . ? 
C4 C5 H5A 119.8 . . ? 
C6 C5 H5A 119.8 . . ? 
C5 C6 C1 121.1(4) . . ? 
C5 C6 H6A 119.5 . . ? 
C1 C6 H6A 119.5 . . ? 
N1 C7 C24 105.5(3) . . ? 
N1 C7 C1 111.4(3) . . ? 
C24 C7 C1 107.6(3) . . ? 
N1 C7 C8 107.6(2) . . ? 
C24 C7 C8 110.8(3) . . ? 
C1 C7 C8 113.6(3) . . ? 
N2 C8 C18 115.9(2) . . ? 
N2 C8 C7 106.8(2) . . ? 
C18 C8 C7 113.0(2) . . ? 
N2 C8 H8A 106.8 . . ? 
C18 C8 H8A 106.8 . . ? 
C7 C8 H8A 106.8 . . ? 
C10 C9 C14 120.5(3) . . ? 
C10 C9 N2 130.3(3) . . ? 
C14 C9 N2 109.2(3) . . ? 
C9 C10 C11 117.2(4) . . ? 
C9 C10 H10A 121.4 . . ? 
C11 C10 H10A 121.4 . . ? 
C12 C11 C10 121.4(4) . . ? 
C12 C11 H11A 119.3 . . ? 
C10 C11 H11A 119.3 . . ? 
C11 C12 C13 121.6(4) . . ? 
C11 C12 H12A 119.2 . . ? 
C13 C12 H12A 119.2 . . ? 
C12 C13 C14 116.7(4) . . ? 
C12 C13 H13A 121.7 . . ? 
C14 C13 H13A 121.7 . . ? 
C9 C14 O4 111.2(3) . . ? 
C9 C14 C13 122.6(4) . . ? 
O4 C14 C13 126.2(3) . . ? 
O3 C15 N1 122.7(3) . . ? 
O3 C15 C16 120.1(3) . . ? 
N1 C15 C16 117.2(3) . . ? 
O4 C16 N2 105.7(3) . . ? 
O4 C16 C17 107.7(3) . . ? 
N2 C16 C17 110.5(3) . . ? 
O4 C16 C15 107.2(3) . . ? 
N2 C16 C15 114.7(3) . . ? 
C17 C16 C15 110.7(3) . . ? 
C16 C17 H17A 109.5 . . ? 
C16 C17 H17B 109.5 . . ? 
H17A C17 H17B 109.5 . . ? 
C16 C17 H17C 109.5 . . ? 
H17A C17 H17C 109.5 . . ? 
H17B C17 H17C 109.5 . . ? 
C19 C18 C23 117.9(3) . . ? 
C19 C18 C8 118.4(3) . . ? 
C23 C18 C8 123.7(3) . . ? 
C20 C19 C18 121.2(3) . . ? 
C20 C19 H19A 119.4 . . ? 
C18 C19 H19A 119.4 . . ? 
C19 C20 C21 120.2(4) . . ? 
C19 C20 H20A 119.9 . . ? 
C21 C20 H20A 119.9 . . ? 
C22 C21 C20 119.4(3) . . ? 
C22 C21 C26 120.2(4) . . ? 
C20 C21 C26 120.5(4) . . ? 
C23 C22 C21 120.6(4) . . ? 
C23 C22 H22A 119.7 . . ? 
C21 C22 H22A 119.7 . . ? 
C22 C23 C18 120.8(3) . . ? 
C22 C23 H23A 119.6 . . ? 
C18 C23 H23A 119.6 . . ? 
O1 C24 O2 125.0(3) . . ? 
O1 C24 C7 123.0(3) . . ? 
O2 C24 C7 111.9(3) . . ? 
O2 C25 H25A 109.5 . . ? 
O2 C25 H25B 109.5 . . ? 
H25A C25 H25B 109.5 . . ? 
O2 C25 H25C 109.5 . . ? 
H25A C25 H25C 109.5 . . ? 
H25B C25 H25C 109.5 . . ? 
F1 C26 F3 107.3(7) . . ? 
F1 C26 F2 107.2(6) . . ? 
F3 C26 F2 96.0(5) . . ? 
F1 C26 C21 116.3(5) . . ? 
F3 C26 C21 114.1(5) . . ? 
F2 C26 C21 113.9(5) . . ? 
C01 Cl1 Cl2 56.8(3) . . ? 
C01 Cl2 Cl1 54.3(3) . . ? 
Cl2' C01 Cl1' 138.4(5) . . ? 
Cl2' C01 Cl1 113.0(6) . . ? 
Cl1' C01 Cl1 45.3(4) . . ? 
Cl2' C01 Cl2 47.6(5) . . ? 
Cl1' C01 Cl2 110.2(6) . . ? 
Cl1 C01 Cl2 68.9(4) . . ? 
 
loop_ 
 _geom_torsion_atom_site_label_1 
 _geom_torsion_atom_site_label_2 
 _geom_torsion_atom_site_label_3 
 _geom_torsion_atom_site_label_4 
 _geom_torsion 
 _geom_torsion_site_symmetry_1 
 _geom_torsion_site_symmetry_2 
 _geom_torsion_site_symmetry_3 
 _geom_torsion_site_symmetry_4 
 _geom_torsion_publ_flag 
C6 C1 C2 C3 -0.3(6) . . . . ? 
C7 C1 C2 C3 -177.9(4) . . . . ? 
C1 C2 C3 C4 0.5(7) . . . . ? 
C2 C3 C4 C5 -0.3(7) . . . . ? 
C3 C4 C5 C6 -0.1(7) . . . . ? 
C4 C5 C6 C1 0.3(7) . . . . ? 
C2 C1 C6 C5 -0.1(6) . . . . ? 
C7 C1 C6 C5 177.4(4) . . . . ? 
C15 N1 C7 C24 160.6(3) . . . . ? 
C15 N1 C7 C1 -82.9(4) . . . . ? 
C15 N1 C7 C8 42.2(4) . . . . ? 
C6 C1 C7 N1 164.6(3) . . . . ? 
C2 C1 C7 N1 -17.9(5) . . . . ? 
C6 C1 C7 C24 -80.2(4) . . . . ? 
C2 C1 C7 C24 97.2(4) . . . . ? 
C6 C1 C7 C8 42.9(4) . . . . ? 
C2 C1 C7 C8 -139.7(3) . . . . ? 
C9 N2 C8 C18 43.3(3) . . . . ? 
C16 N2 C8 C18 -84.6(3) . . . . ? 
C9 N2 C8 C7 170.3(2) . . . . ? 
C16 N2 C8 C7 42.4(3) . . . . ? 
N1 C7 C8 N2 -58.6(3) . . . . ? 
C24 C7 C8 N2 -173.5(2) . . . . ? 
C1 C7 C8 N2 65.2(3) . . . . ? 
N1 C7 C8 C18 70.2(3) . . . . ? 
C24 C7 C8 C18 -44.8(3) . . . . ? 
C1 C7 C8 C18 -166.1(3) . . . . ? 
C16 N2 C9 C10 -169.7(4) . . . . ? 
C8 N2 C9 C10 54.9(5) . . . . ? 
C16 N2 C9 C14 11.5(3) . . . . ? 
C8 N2 C9 C14 -123.9(3) . . . . ? 
C14 C9 C10 C11 -1.9(6) . . . . ? 
N2 C9 C10 C11 179.5(4) . . . . ? 
C9 C10 C11 C12 2.1(7) . . . . ? 
C10 C11 C12 C13 -1.3(8) . . . . ? 
C11 C12 C13 C14 0.1(7) . . . . ? 
C10 C9 C14 O4 -177.5(3) . . . . ? 
N2 C9 C14 O4 1.4(4) . . . . ? 
C10 C9 C14 C13 0.8(6) . . . . ? 
N2 C9 C14 C13 179.7(4) . . . . ? 
C16 O4 C14 C9 -13.8(4) . . . . ? 
C16 O4 C14 C13 167.9(4) . . . . ? 
C12 C13 C14 C9 0.1(6) . . . . ? 
C12 C13 C14 O4 178.2(4) . . . . ? 
C7 N1 C15 O3 176.5(3) . . . . ? 
C7 N1 C15 C16 -1.9(5) . . . . ? 
C14 O4 C16 N2 20.4(3) . . . . ? 
C14 O4 C16 C17 -97.8(3) . . . . ? 
C14 O4 C16 C15 143.1(3) . . . . ? 
C9 N2 C16 O4 -19.4(3) . . . . ? 
C8 N2 C16 O4 113.9(3) . . . . ? 
C9 N2 C16 C17 96.9(3) . . . . ? 
C8 N2 C16 C17 -129.8(3) . . . . ? 
C9 N2 C16 C15 -137.2(3) . . . . ? 
C8 N2 C16 C15 -3.9(4) . . . . ? 
O3 C15 C16 O4 45.5(4) . . . . ? 
N1 C15 C16 O4 -136.0(3) . . . . ? 
O3 C15 C16 N2 162.5(3) . . . . ? 
N1 C15 C16 N2 -19.1(4) . . . . ? 
O3 C15 C16 C17 -71.7(4) . . . . ? 
N1 C15 C16 C17 106.8(4) . . . . ? 
N2 C8 C18 C19 -134.7(3) . . . . ? 
C7 C8 C18 C19 101.4(3) . . . . ? 
N2 C8 C18 C23 44.7(4) . . . . ? 
C7 C8 C18 C23 -79.1(4) . . . . ? 
C23 C18 C19 C20 2.1(5) . . . . ? 
C8 C18 C19 C20 -178.4(3) . . . . ? 
C18 C19 C20 C21 -1.2(6) . . . . ? 
C19 C20 C21 C22 -0.2(6) . . . . ? 
C19 C20 C21 C26 178.5(4) . . . . ? 
C20 C21 C22 C23 0.8(6) . . . . ? 
C26 C21 C22 C23 -177.9(4) . . . . ? 
C21 C22 C23 C18 0.1(6) . . . . ? 
C19 C18 C23 C22 -1.5(5) . . . . ? 
C8 C18 C23 C22 179.0(3) . . . . ? 
C25 O2 C24 O1 -2.3(5) . . . . ? 
C25 O2 C24 C7 179.1(3) . . . . ? 
N1 C7 C24 O1 9.2(4) . . . . ? 
C1 C7 C24 O1 -109.8(4) . . . . ? 
C8 C7 C24 O1 125.4(3) . . . . ? 
N1 C7 C24 O2 -172.2(2) . . . . ? 
C1 C7 C24 O2 68.8(3) . . . . ? 
C8 C7 C24 O2 -55.9(3) . . . . ? 
C22 C21 C26 F1 90.7(8) . . . . ? 
C20 C21 C26 F1 -87.9(8) . . . . ? 
C22 C21 C26 F3 -35.0(8) . . . . ? 
C20 C21 C26 F3 146.3(6) . . . . ? 
C22 C21 C26 F2 -143.8(5) . . . . ? 
C20 C21 C26 F2 37.5(7) . . . . ? 
Cl2 Cl1 C01 Cl2' 18.3(5) . . . . ? 
Cl2 Cl1 C01 Cl1' 154.6(5) . . . . ? 
Cl1 Cl2 C01 Cl2' -157.0(5) . . . . ? 
Cl1 Cl2 C01 Cl1' -19.0(4) . . . . ? 
 
_diffrn_measured_fraction_theta_max    0.999 
_diffrn_reflns_theta_full              25.01 
_diffrn_measured_fraction_theta_full   0.999 
_refine_diff_density_max    0.652 
_refine_diff_density_min   -0.476 
_refine_diff_density_rms    0.052 
